# Supplementary material
Source: PubMed Central journal article supplement (PMC2937793)
Supplement: supp_84_19_9920__5.pdf [file supp_84_19_9920__5.pdf]

**Fig. S5**

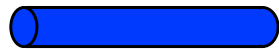

|             |                             |         |
|-------------|-----------------------------|---------|
| <b>EBV</b>  | EASHLLEDPDEETSQAVKALREMADTV | 500-526 |
| <b>rLCV</b> | EAGTGVEDPDEETSQAVKALREMTLA  | 497-523 |
| <b>mLCV</b> | PEPTVPPESVDETERAVCALRELAEAA | 502-527 |

:. :\*\*.:\*\* \*\*\*\*\*: . .
