# Supplementary material
Source: PubMed Central journal article supplement (PMC2937793)

Fig. S1

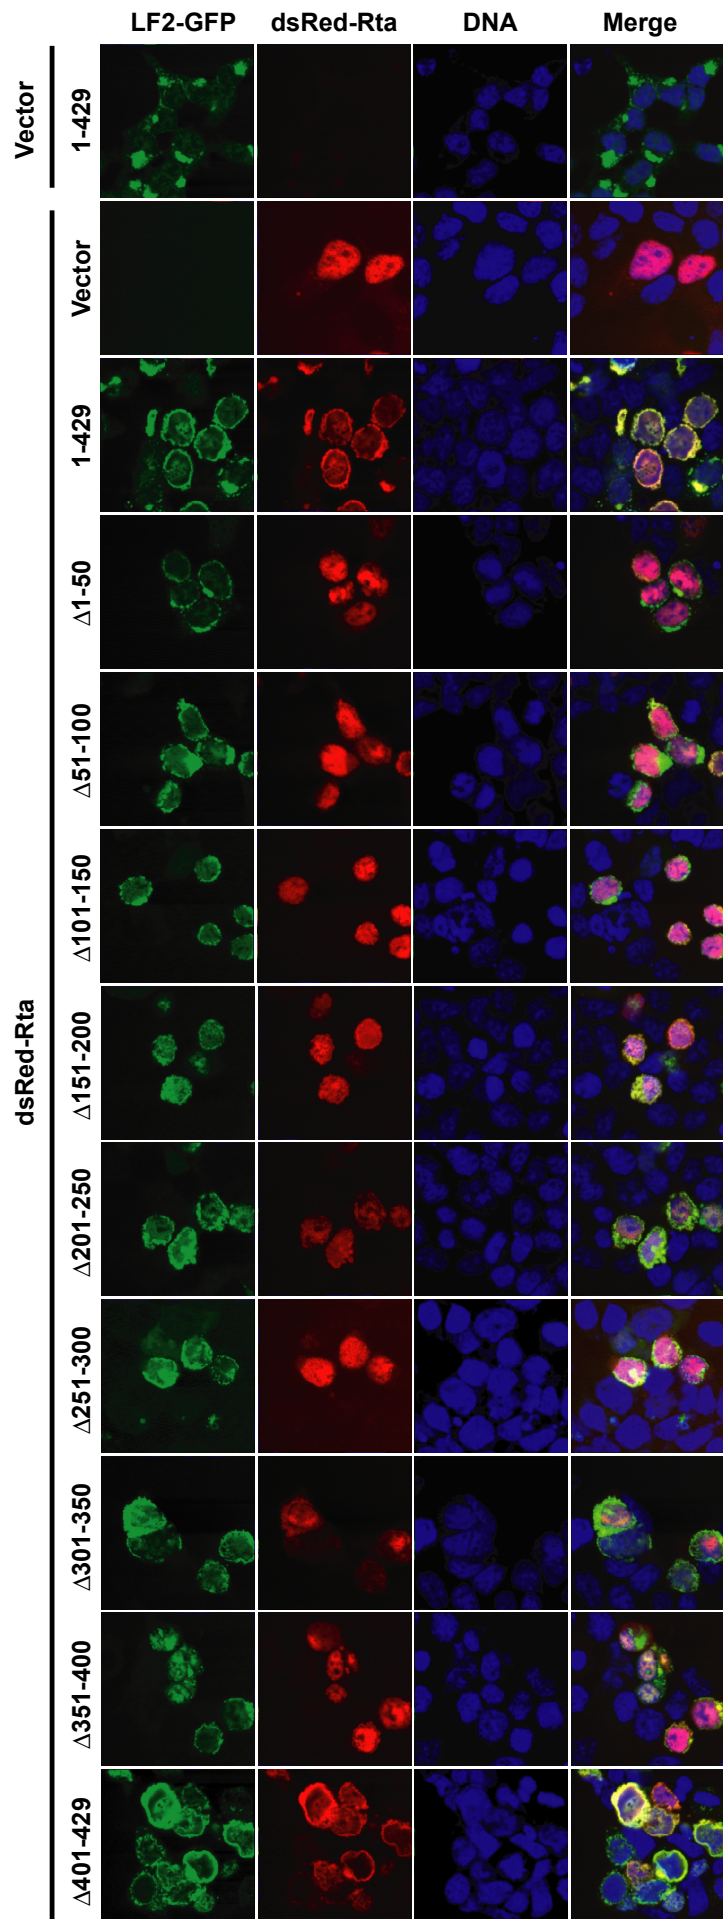

Supplement: supp_84_19_9920__1.pdf [file supp_84_19_9920__1.pdf]

Fig. S3

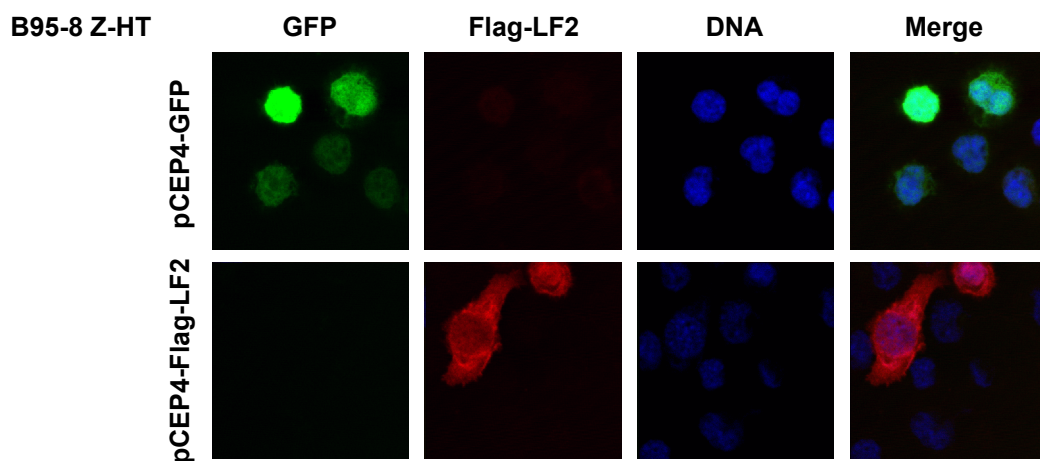

Supplement: supp_84_19_9920__3.pdf [file supp_84_19_9920__3.pdf]

**Fig. S4**

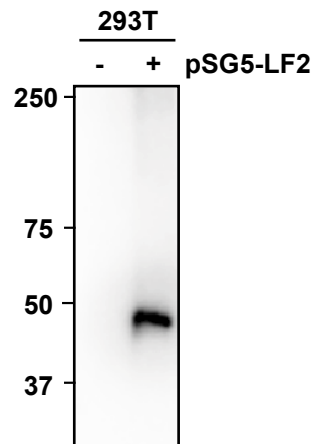

Supplement: supp_84_19_9920__4.pdf [file supp_84_19_9920__4.pdf]
